# Supplementary material
Source: PubMed Central journal article supplement (PMC4175030)
Supplement: Supp_Fig1.pdf [file Supp_Fig1.pdf]

### Serum PU concentration

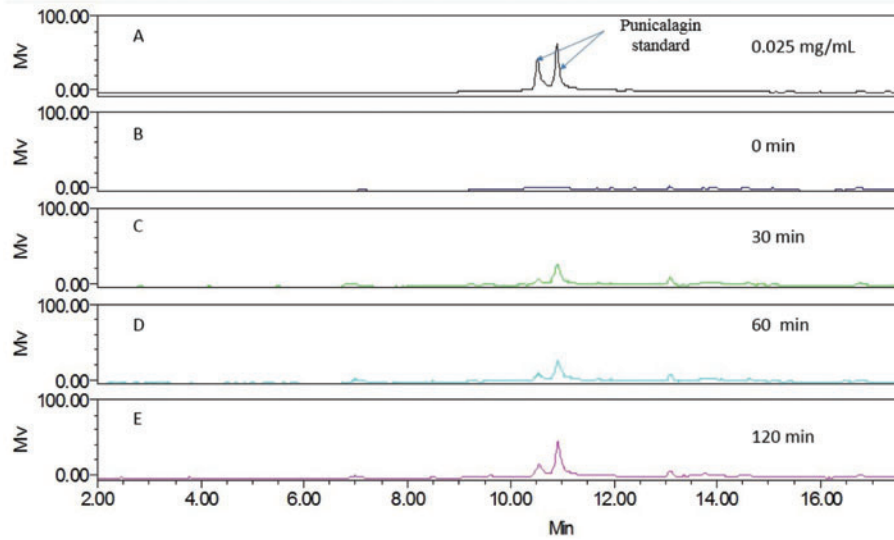

**SUPPLEMENTARY FIG. S1. Serum PU concentration.** UPLC analysis of serum PU. (A) 0.025 mg/ml PU standard; (B) Rat serum without PE administration; (C) Rat serum PU after 150 mg/kg PE administration at 30 min; (D) Rat serum PU after 150 mg/kg PE administration at 60 min; (E) Rat serum PU after 150 mg/kg PE administration at 120 min. PU standard curve:  $y=0.0064x-0.0179$ , the area of peak E is 5.712, the concentration of serum PU at 120 min is  $17.3 \mu\text{g/ml}$  after calculation. PE, pomegranate extract; PU, punicalagin.
