# Supplementary material
Source: PubMed Central journal article supplement (PMC4175030)
Supplement: Supp_Table1.pdf [file Supp_Table1.pdf]

## Supplementary Data

SUPPLEMENTARY TABLE S1. COMPOSITION OF THE CONTROL AND HIGH-FAT DIETS

| <i>Ingredients</i> | <i>Control<br/>(g/100 g diet)</i> | <i>High-fat diet<br/>(g/100 g diet)</i> |
|--------------------|-----------------------------------|-----------------------------------------|
| Cornstarch         | 60                                | 39                                      |
| Sucrose            | 10                                | 10                                      |
| Casein             | 15                                | 15                                      |
| Soybean oil        | 7                                 | 7                                       |
| Fiber              | 4                                 | 4                                       |
| Mineral mix        | 4                                 | 4                                       |
| Lard               | —                                 | 21                                      |
