# Supplementary material
Source: PubMed Central journal article supplement (PMC4175030)
Supplement: Supp_Table2.pdf [file Supp_Table2.pdf]

SUPPLEMENTARY TABLE S2. PRIMER SEQUENCES USED FOR REAL-TIME POLYMERASE CHAIN REACTION AMPLIFICATION

| <i>Gene</i>    | <i>5'-3' primer sequence</i>                                           |
|----------------|------------------------------------------------------------------------|
| ACADL          | Forward 5-CGTAGTGGCCGTCACCAATC-3<br>Reverse 5-AAGTAGGGCACTAGCTGGCA-3   |
| ACADM          | Forward 5-GCCAGACTCAGTTACCAGCG-3<br>Reverse 5-GATAGATCTTGCGTCCCCGC-3   |
| ACADVL         | Forward 5-CACTGTAGTGGAGGCCGAAGC-3<br>Reverse 5-TTCTCATGCTGTGCTGTCGG-3  |
| ACC1           | Forward 5-TGAAGGGCTACCTCTAATG-3<br>Reverse 5-TCACAACCCAAGAACCAC-3      |
| ACLY           | Forward 5-CTTTCTGATTGAGCCCTTCG-3<br>Reverse 5-TGTCCACATCGCCACAT-3      |
| CPT1A          | Forward 5-GACACCAACCCCAACATCCC-3<br>Reverse 5-TGGATGAAGGCATCGGGACT-3   |
| CPT1B          | Forward 5-ACCTCTGGGAGTTCGTCCTG-3<br>Reverse 5-GGCCTTGGCTACTTGGTACG-3   |
| DGAT1          | Forward 5-TCCGGACAACCTGACCTACC-3<br>Reverse 5-TAGGGACCATCCACTGCTGG-3   |
| DGAT2          | Forward 5-TTGACTGGAACACGCCCAAG-3<br>Reverse 5-AGGCCTTATGCCAGGGAACT-3   |
| FAS            | Forward 5-TCCTGTTATCACCCGACT-3<br>Reverse 5-GAATACGACCACGCACTAC-3      |
| GPAM           | Forward 5-GACGAATCTGCCGCTCTTGT-3<br>Reverse 5-TGTTGAGGTTGTTGCCCGAG-3   |
| PPAR $\alpha$  | Forward 5-CTGAAAGATTTCGGAAACTGC-3<br>Reverse 5-GTATGACAAAAGGCGGATTG-3  |
| PGC-1 $\alpha$ | Forward 5-CACAGGTCGTGTTCCCGATC-3<br>Reverse 5-TGTCATACCTGGGCCTACGG-3   |
| PGC-1 $\beta$  | Forward 5-CCCTAGGTGCTCTACCCTCG-3<br>Reverse 5-GTGTCACCCACACCCACTTTC-3  |
| SCD1           | Forward 5-CCACCTCTATGGGTATCG-3<br>Reverse 5-TGATGGTAGTTGTGGAAGC-3      |
| SREBP-1        | Forward 5-CGCTACCGTTCCTCTATC-3<br>Reverse 5-GGTCTTTCAGTGATTTGC-3       |
| $\beta$ -Actin | Forward 5-ACCCGCGAGTACAACCTTCTT-3<br>Reverse 5-GCCGTGTTCAATGGGGTACTT-3 |

ACADL, acyl-CoA dehydrogenase, long chain; ACADM, acyl-CoA dehydrogenase, C2-C12 straight chain; ACADVL, acyl-CoA dehydrogenase, very long chain; ACC1, acetyl-CoA carboxylase 1; ACLY, ATP citrate lyase; CPT1, carnitine palmitoyltransferase 1; DGAT, diglyceride acyltransferase; FAS, fatty acid synthase; GPAM, glycerol-3-phosphate acyltransferase; PGC-1 $\alpha$ , peroxisomal proliferator-activated receptor-gamma coactivator-1 $\alpha$ ; PPAR $\alpha$ , peroxisome proliferator activated receptor  $\alpha$ ; SCD1, stearoyl-CoA desaturase 1; SREBP, sterol regulatory element binding protein.
